# Supplementary material for: miR-1262 suppresses gastric cardia adenocarcinoma via targeting oncogene ULK1
Source: J Cancer. 2021 Jan 1;12(4):1231–9. doi: 10.7150/jca.46971 (PMC7797638; doi:10.7150/jca.46971)
Supplement: Supplementary file 1 — Supplementary figures and tables. [file jcav12p1231s1.pdf]

**Table S1.** Distribution of selected characteristics among GCA cases and controls

| Variable        | Shandong set<br>(Discovery set) |                | <i>P</i> <sup>†</sup> | Jiangsu set<br>(Validation set) |                | <i>P</i> <sup>†</sup> |
|-----------------|---------------------------------|----------------|-----------------------|---------------------------------|----------------|-----------------------|
|                 | Cases                           | Controls       |                       | Cases                           | Controls       |                       |
|                 | No. (%)                         | No. (%)        |                       | No. (%)                         | No. (%)        |                       |
|                 | <i>n</i> = 584                  | <i>n</i> = 568 |                       | <i>n</i> = 440                  | <i>n</i> = 500 |                       |
| Age (year)      |                                 |                | 0.458                 |                                 |                | 0.320                 |
| ≤66             | 314(53.8)                       | 293(51.6)      |                       | 226(51.4)                       | 265(48.2)      |                       |
| >66             | 270(46.2)                       | 275(48.4)      |                       | 214(48.6)                       | 285(51.8)      |                       |
| Sex             |                                 |                | 0.598                 |                                 |                | 0.512                 |
| Male            | 494(84.6)                       | 474(83.5)      |                       | 367(83.4)                       | 450(81.8)      |                       |
| Female          | 90(15.4)                        | 94(16.5)       |                       | 73(16.6)                        | 100(18.2)      |                       |
| Smoking status  |                                 |                | <0.001                |                                 |                | <0.001                |
| No              | 309(52.9)                       | 449(79.0)      |                       | 213(48.4)                       | 412(74.9)      |                       |
| Yes             | 275(47.1)                       | 119(21.0)      |                       | 227(51.6)                       | 138(25.1)      |                       |
| Drinking status |                                 |                | 0.006                 |                                 |                | 0.005                 |
| No              | 349(59.8)                       | 384(97.6)      |                       | 238(54.1)                       | 346(62.9)      |                       |
| Yes             | 235(40.2)                       | 184(32.4)      |                       | 202(45.9)                       | 204(37.1)      |                       |
| Disease stage   |                                 |                |                       |                                 |                |                       |
| I               | 43(7.4)                         |                |                       | 35(8.0)                         |                |                       |
| II              | 115(19.7)                       |                |                       | 90(20.4)                        |                |                       |
| III             | 269(46.0)                       |                |                       | 202(45.9)                       |                |                       |
| IV              | 157(26.9)                       |                |                       | 113(25.7)                       |                |                       |

Note: GCA, gastric cardia adenocarcinoma.

<sup>†</sup>Two-sided  $\chi^2$  test.

**Table S2.** Associations between *miR-1262* rs12740674 genetic polymorphism and GCA risk stratified by disease stages

| Stages | Genotypes | Cases<br>No. (%) | Controls<br>No. (%) | OR <sup>†</sup> (95% CI) | P <sup>†</sup> |
|--------|-----------|------------------|---------------------|--------------------------|----------------|
| I      |           | <i>n</i> = 78    | <i>n</i> = 1118     |                          |                |
|        | CC        | 54(69.2)         | 733(65.6)           | 1.00(Reference)          |                |
|        | CT        | 22(28.2)         | 359(32.1)           | 1.28(0.46-3.57)          | 0.642          |
|        | TT        | 2(2.6)           | 26(2.3)             | N.C.                     | N.C.           |
| II     |           | <i>n</i> = 205   | <i>n</i> = 1118     |                          |                |
|        | CC        | 155(75.6)        | 733(65.6)           | 1.00(Reference)          |                |
|        | CT        | 39(19.0)         | 359(32.1)           | 0.52(0.26-1.03)          | 0.060          |
|        | TT        | 11(5.4)          | 26(2.3)             | 1.21(0.48-3.03)          | 0.682          |
| III    |           | <i>n</i> = 471   | <i>n</i> = 1118     |                          |                |
|        | CC        | 337(71.5)        | 733(65.6)           | 1.00(Reference)          |                |
|        | CT        | 124(26.4)        | 359(32.1)           | 0.61(0.40-0.94)          | 0.026          |
|        | TT        | 10(2.1)          | 26(2.3)             | 0.95(0.49-1.84)          | 0.870          |
| IV     |           | <i>n</i> = 270   | <i>n</i> = 1118     |                          |                |
|        | CC        | 203(75.2)        | 733(65.6)           | 1.00(Reference)          |                |
|        | CT        | 61(22.6)         | 359(32.1)           | 0.75 (0.42-1.34)         | 0.333          |
|        | TT        | 6(2.2)           | 385(34.4)           | 0.77(0.36-1.66)          | 0.502          |

Note: GCA, gastric cardia adenocarcinoma; N.C., not calculated; OR, odds ratio; CI, confidence interval.

<sup>†</sup>Data were calculated by logistic regression with adjustment for age, sex, smoking and drinking status.

**Table S3.** Oligonucleotides used in the current study

| #                                            | Oligonucleotide Sequences (5'→3')           |
|----------------------------------------------|---------------------------------------------|
| <b>rs12740674 Sequenom Primers</b>           |                                             |
| PCR primers-F                                | ACGTTGGATGTGACATCCTGATGAGTCAGC              |
| PCR primers-R                                | ACGTTGGATGGACTAATCCCCATCTCTCTC              |
| UEP_SEQ primer                               | CCAAATAACTCAGGGTCA                          |
| EXT1_SEQ primer                              | CCAAATAACTCAGGGTCAC                         |
| EXT2_SEQ primer                              | CCAAATAACTCAGGGTCAT                         |
| <b>ULK1 siRNA duplexes</b>                   |                                             |
| siULK1-1                                     | UCAUCACCCUUUCCUCGAUTT/AUCGAGGAAAGGGUGAUGATT |
| siULK1-2                                     | CCUGUGACACAGACGACUUTT/AAGUCGUCUGUGUCACAGGTT |
| siULK1-3                                     | GCAGAACUACCAGCGCAUUTT/AAUGCGCUGGUAGUUCUGCTT |
| <b>ULK1 qRT-PCR primers</b>                  |                                             |
| ULK1-qF                                      | GGCAAGTTCGAGTTCTCCCG                        |
| ULK1-qR                                      | CGACCTCCAAATCGTGCTTCT                       |
| <b><i>β-actin</i> qRT-PCR primers</b>        |                                             |
| <i>β-actin</i> -qF                           | GGCGGCACCACCATGTACCCT                       |
| <i>β-actin</i> -qR                           | AGGGGCCGGACTCGTCATACT                       |
| <b><i>miR-1262</i> reporter gene primers</b> |                                             |
| p-491F                                       | CGGGGTACCGTCATCTCAGAAACCAAGTT               |
| p-491R                                       | CCGCTCGAGCTTCCTTCCTATTTTCAGGT               |
| <b>ULK1 3'-UTR reporter gene constructs</b>  |                                             |
| ULK1-3'-UTR-F                                | CCGCTCGAGCTGTGCCAGGAAGAGCCTG (XhoI)         |
| ULK1-3'-UTR-R                                | CTAGAAGCTTGGCATGTGTCTGCATATGTG (HindIII)    |
| Mutagenesis 3'-UTR-F                         | ACCCAGCTTTGTCAAGACATAGCGCACTTTATGCATATAG    |
| Mutagenesis 3'-UTR-R                         | CTATATGCATAAAGTGCGCTATGTCTTGACAAAGCTGGGT    |

## Supplementary Figures

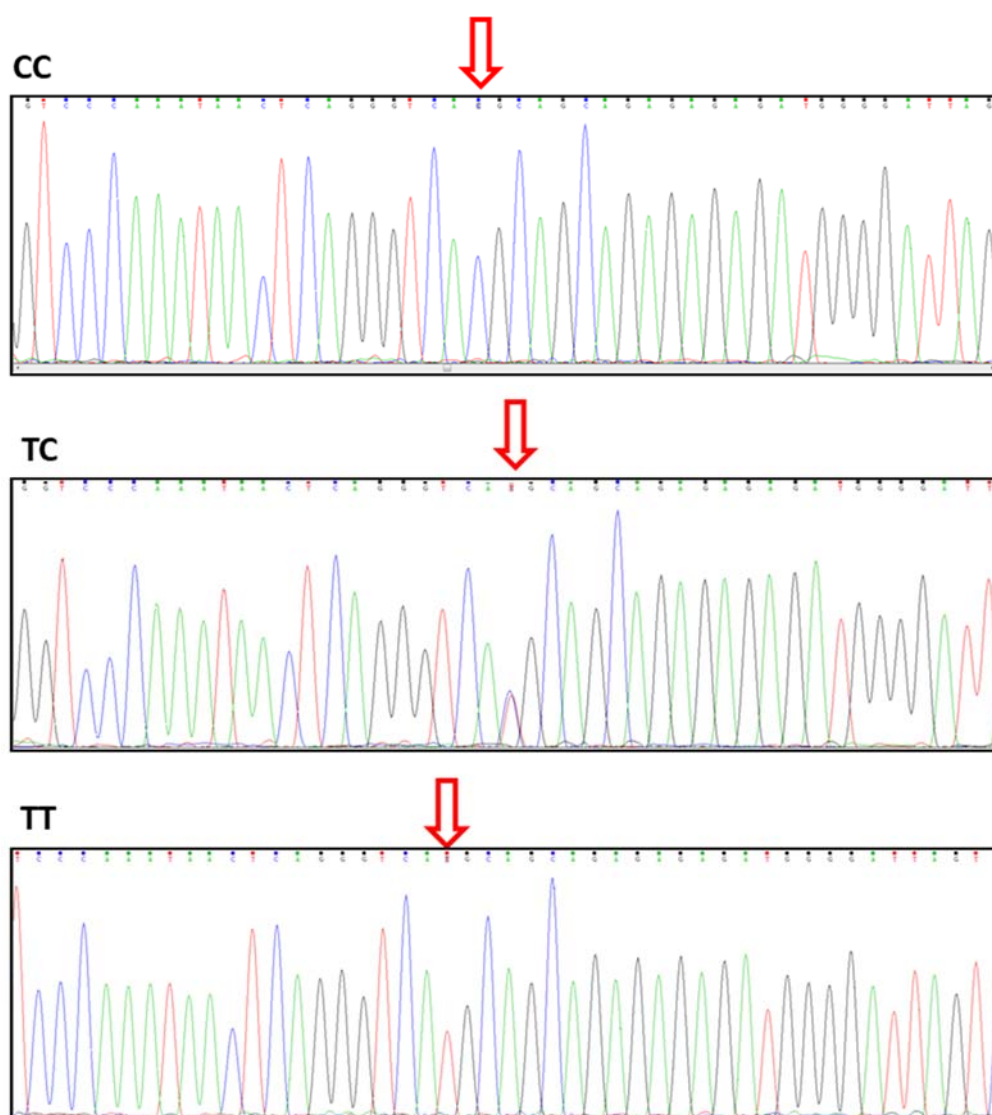

**Figure S1.** Sanger sequencing of rs12740674 CC, CT and TT genotypes of GCA tissues.

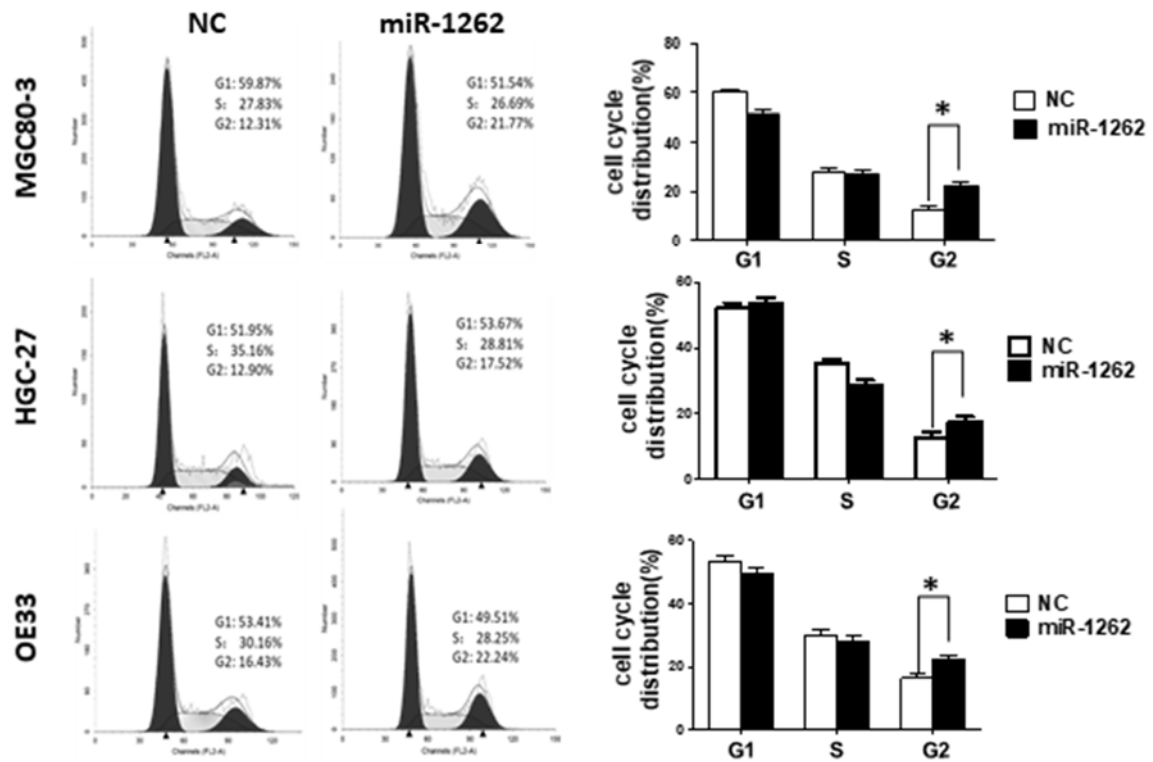

**Figure S2. miR-1262 elevates G2/M populations of MGC80-3, HGC-27 and OE33 cells.** MGC80-3, HGC-27 and OE33 cells were transfected with miR-1262 mimics or NC RNA, 48 hours after transfection, cells were collected and dyed with PI, detected with the FACS Calibur FCM. \* $P < 0.05$

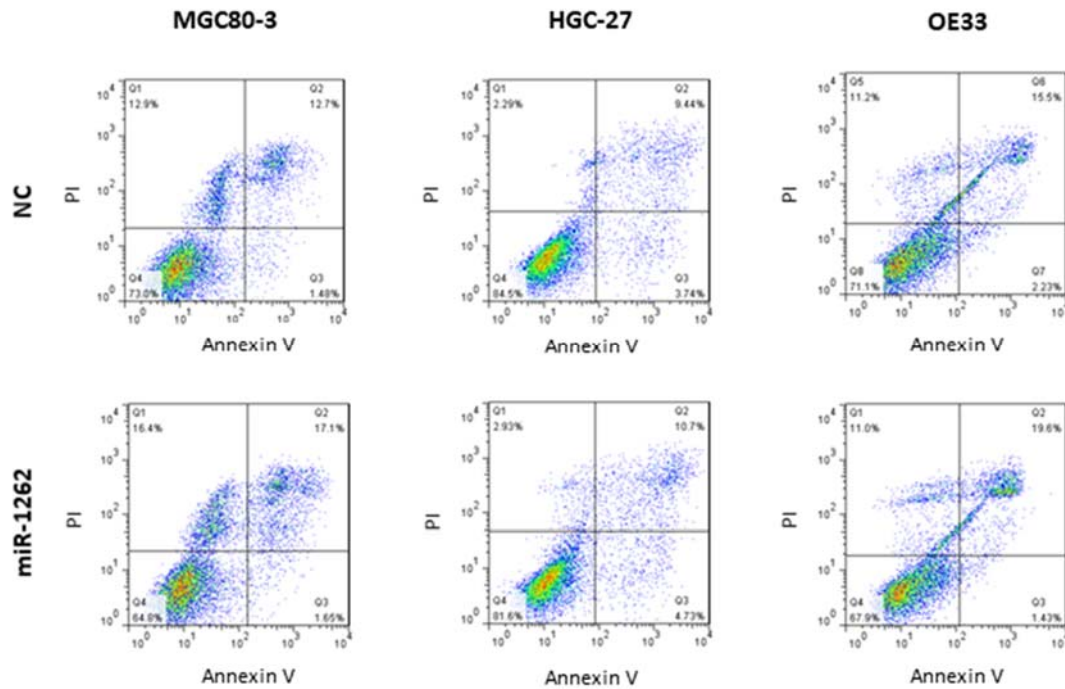

**Figure S3. miR-1262 does not influence the apoptosis of MGC80-3, HGC-27 and OE33 cells.** MGC80-3, HGC-27 and OE33 cells were transfected with miR-1262 mimics or NC RNA, 48 hours after transfection, cells were collected and determined using the Alexa Fluor 488 annexinV/Dead Cell Apoptosis Kit with FACS Calibur flow cytometer. \* $P < 0.05$ . One of three experiments with similar results is shown.

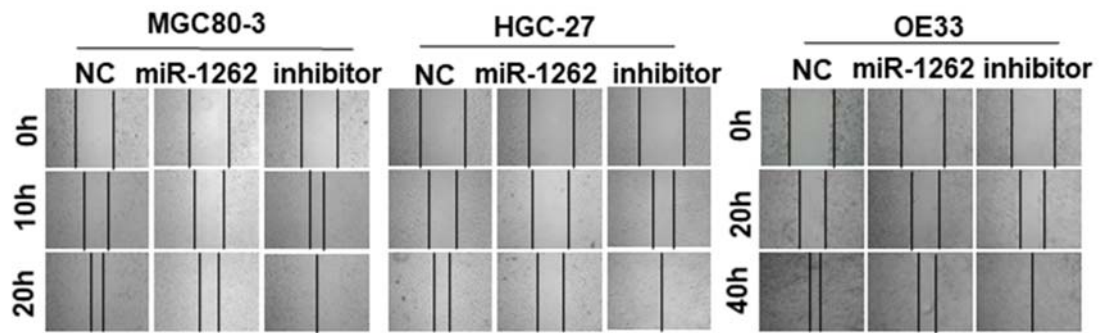

**Figure S4. miR-1262 inhibits wound healing in MGC80-3, HGC-27 and OE33 cells.** MGC80-3, HGC-27 or OE33 cells were transfected with miR-1262 mimics, miR-1262 inhibitors, or NC RNA, a wound was scratched by a 10 $\mu$ l pipette tip. The average extent of wound closure was measured at different time points. One of three experiments with similar results is shown.

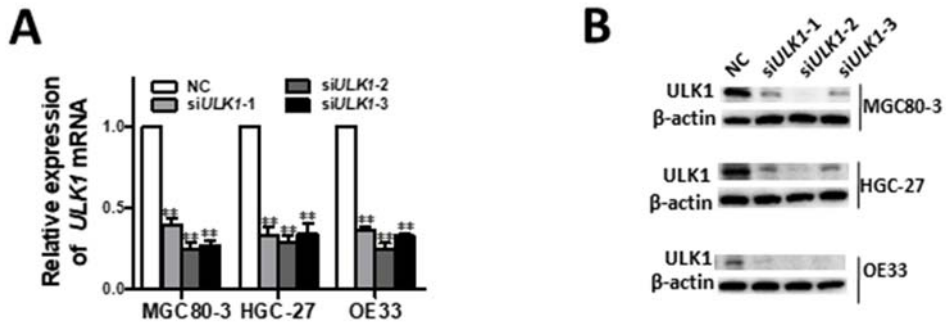

**Figure S5.** siRNAs targeting to *ULK1* successfully reduced ULK1 expression (A) *ULK1* mRNA expression level detected using qRT-PCR method. (B) ULK1 protein expression level detected using western blotting method. One of three experiments with similar results is shown.

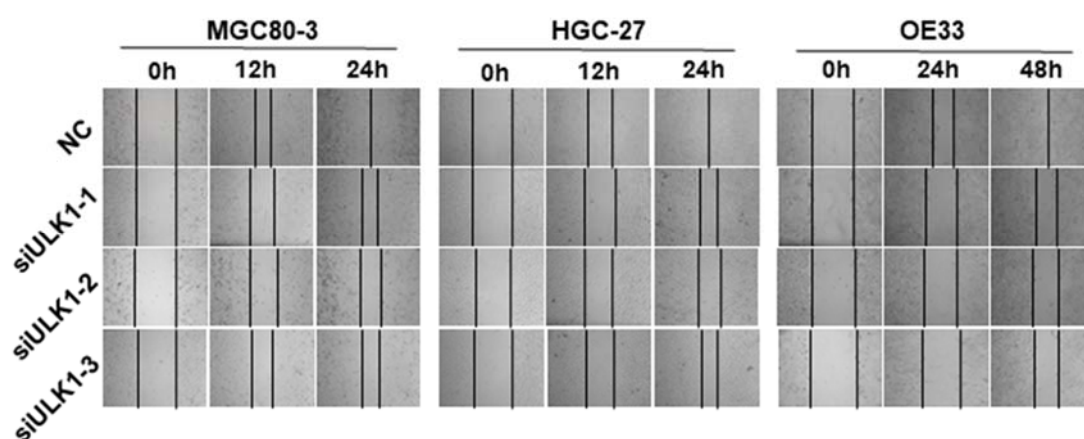

**Figure S6. ULK1 siRNAs inhibit wound healing in MGC80-3, HGC-27 and OE33 cells.** MGC80-3, HGC-27 or OE33 cells were transfected with *ULK1* siRNAs or NC RNA, a wound was scratched by a 10 $\mu$ l pipette tip. The average extent of wound closure was measured after MGC80-3, HGC-27 or OE33 cells were continued cultured at 37°C. One of three experiments with similar results is shown.
